# Supplementary material for: Inhibition of metastasis of rhabdomyosarcoma by a novel neutralizing antibody to CXC chemokine receptor-4
Source: PubMed Central journal article supplement — Cancer Sci. 2014 Sep 25;105(10):1343–50. doi: 10.1111/cas.12490 (PMC4462355; doi:10.1111/cas.12490), 2014-09-25
Supplement: cas0105-1343-sd1.pdf [file cas0105-1343-sd1.pdf]

Fig. S1

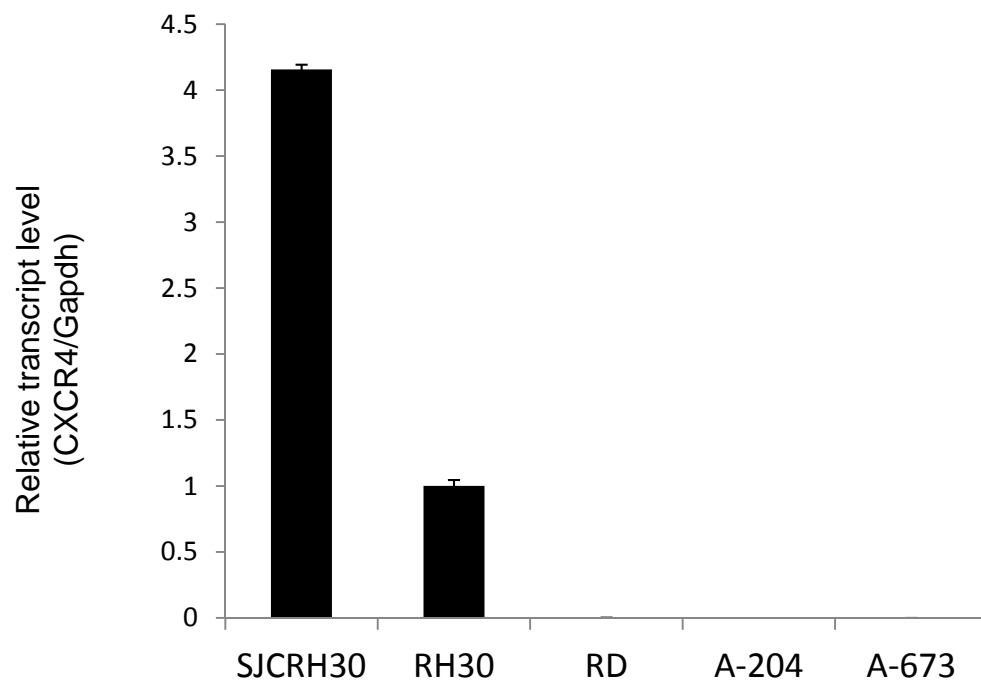

**Fig. S1 mRNA expression of CXCR4 in rhabdomyosarcoma cell lines.** CXCR4 mRNA expression in 5 different rhabdomyosarcoma cell lines was analyzed by the TaqMan assay (n = 3 for each cell line). Data were normalized to GAPDH expression.

# Fig. S2

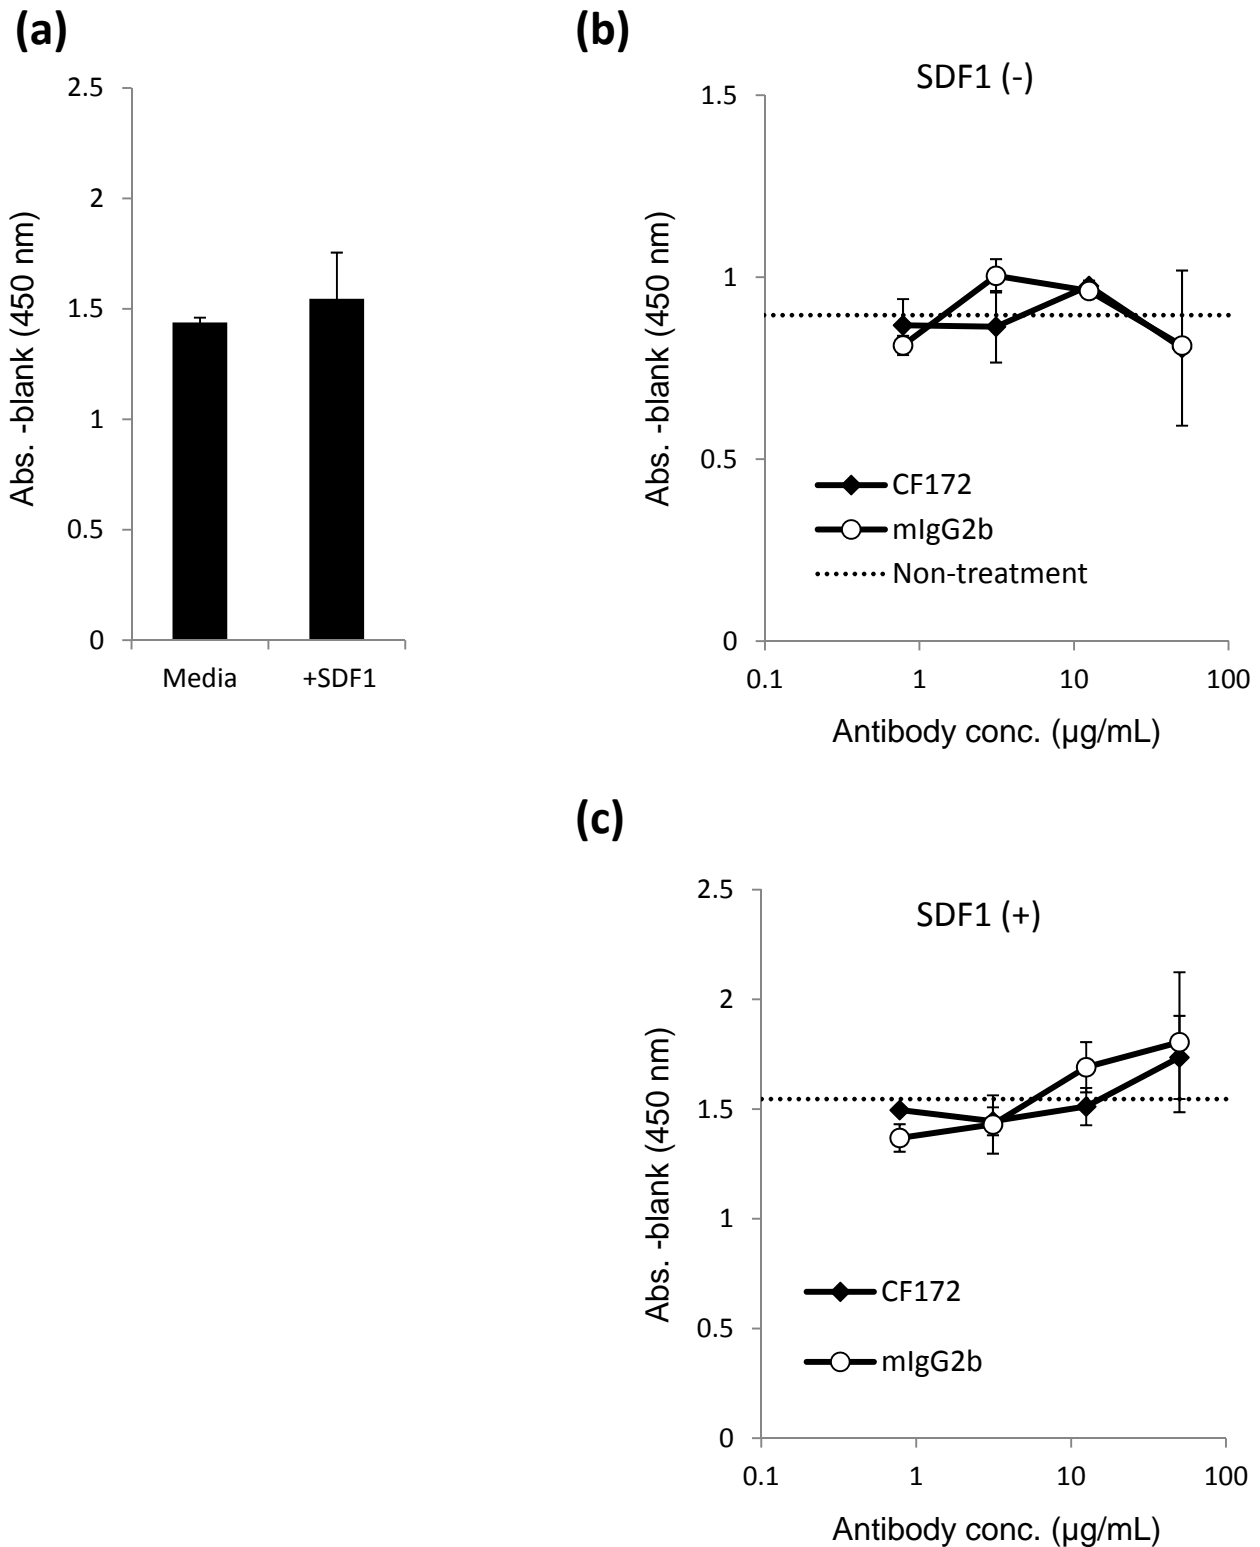

**Fig. S2 Growth inhibition activity of CF172 against SJCRH30 cells.** (a) SJCRH30 cells were incubated with or without 100 nM of SDF1 for 96 h. The number of living cells was then determined using Cell Counting Kit-8 solution. SJCRH30 cells were incubated with serially diluted CF172 (black square) and mIgG2b control (white circles) and (b) without 100 nM SDF1 or (c) with 100 nM SDF1 for 96 h. The number of living cells was then determined using Cell Counting Kit-8 solution. The cell number when 0 ng/mL antibody was added is indicated by the dotted line.

Fig. S3

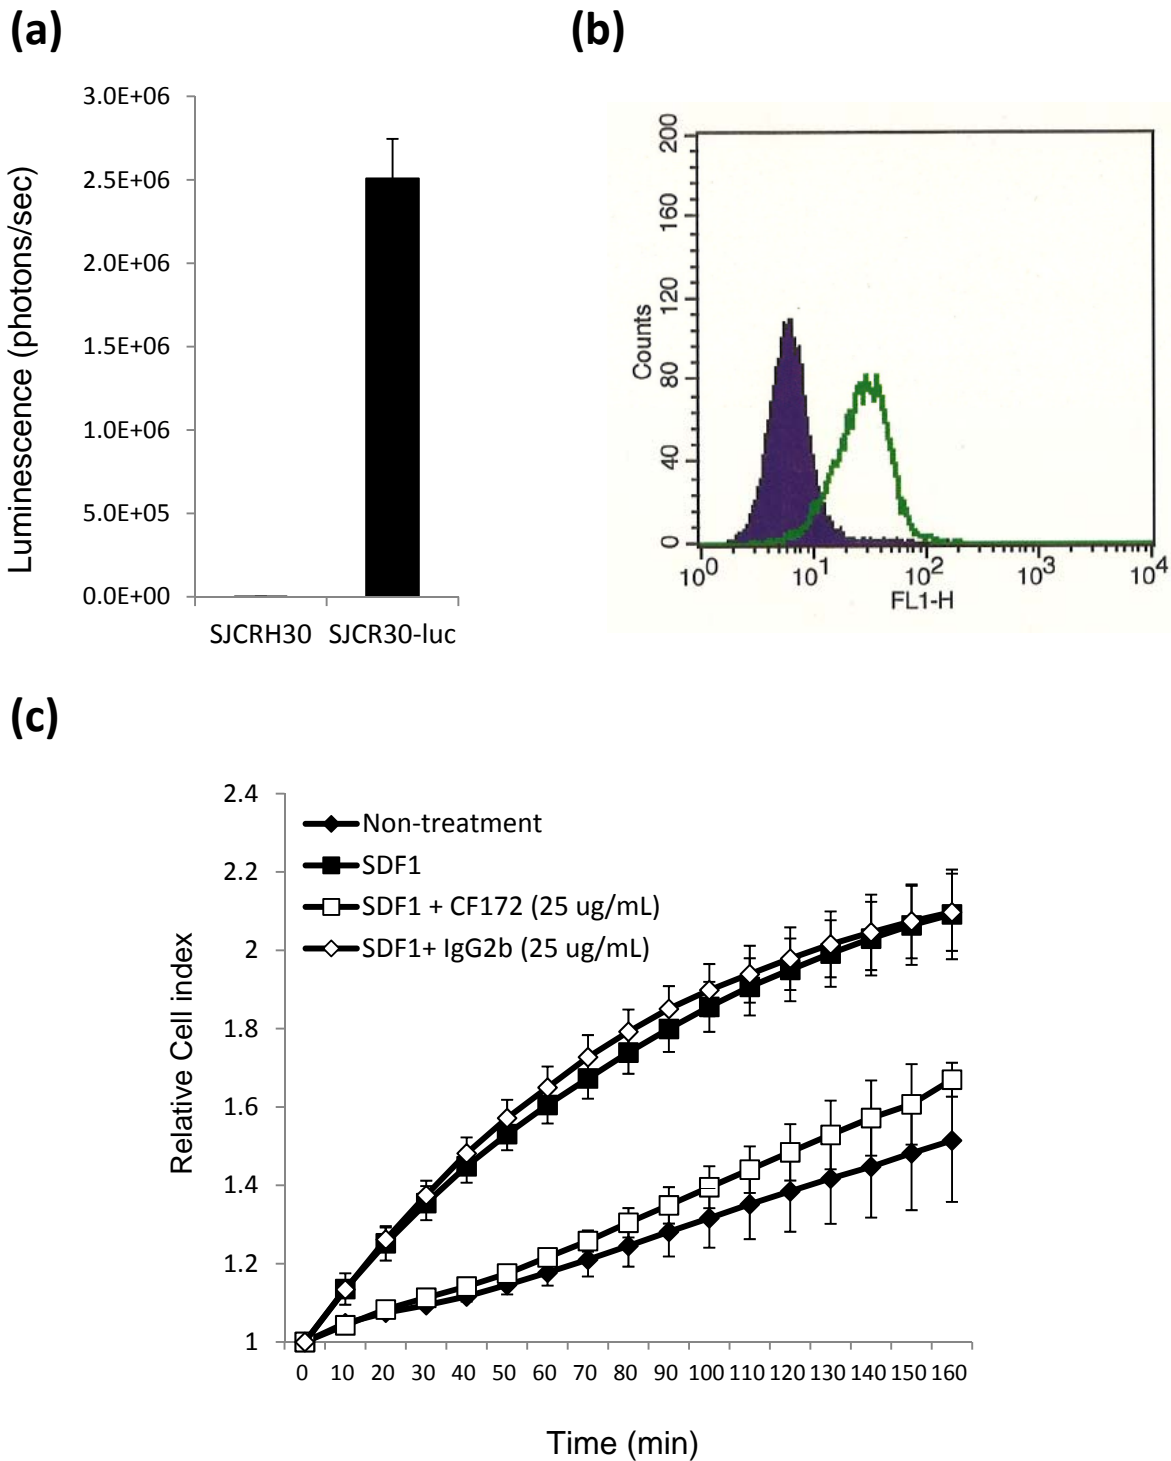

**Fig. S3 Comparison of profile of SJCRH30 and SJCRH30-luc cells.** (a) SJCRH30-luc was generated by transfection with a luciferase expression vector. Luciferase activity was confirmed by the Bright-Glo luciferase assay system (n = 3 for each cell line). (b) CXCR4 membrane expression in SJCRH30-luc was analyzed by flow cytometry using CF172. The background binding determined using the isotype control (solid area) is also shown. (c) The xCELLigence system was used to monitor real-time cell migration. SJCRH30-luc cells with antibodies were seeded in the growth medium in the upper chamber of a CIM-Plate. The upper chamber was then placed on the lower chamber of the CIM-Plate containing 10 nM SDF-1 $\alpha$ . Cell migration was monitored over a period of up to 7 h. All points indicate the mean  $\pm$  SD (n = 3).

Fig. S4

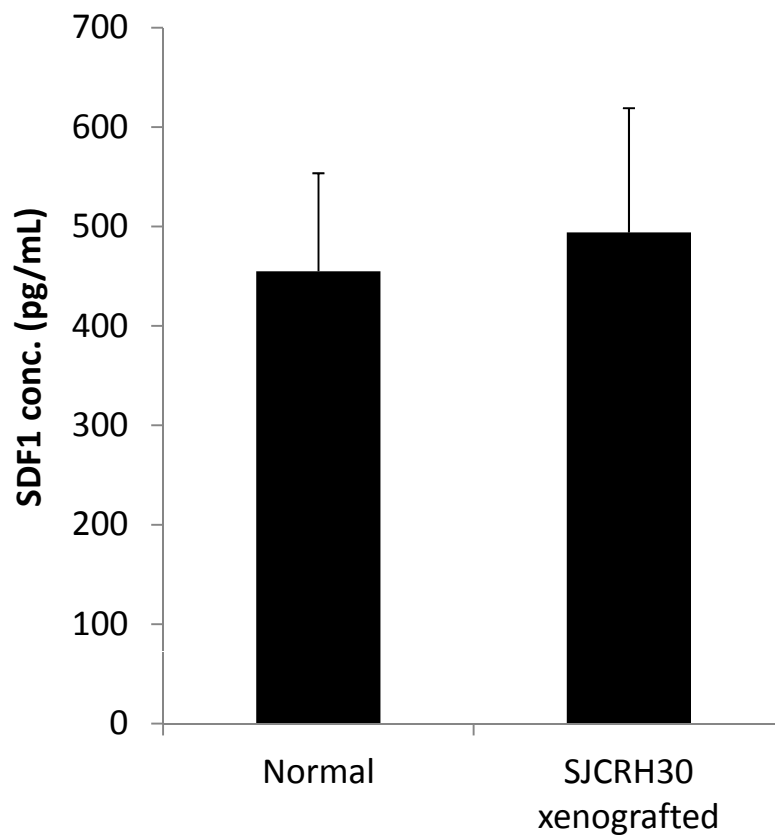

**Fig. S4 Comparison of SDF1 concentration in ascites fluid of normal mice and SJCRH30-luc-xenografted mice.** SDF1 concentration in ascites fluid of normal mice and SJCRH30-luc-xenografted mice was analyzed by Quantikine CXCL12/SDF-1 alpha ELISA kit (R&D systems). Assay was performed by  $n = 5$ . All values are expressed as the mean  $\pm$  SD.
